# Supplementary material for: Tai Chi as an Alternative Exercise to Improve Physical Fitness for Children and Adolescents with Intellectual Disability
Source: Int J Environ Res Public Health. 2019 Mar 30;16(7):1152. doi: 10.3390/ijerph16071152 (PMC6479776; doi:10.3390/ijerph16071152)
Supplement: Supplementary file 1 [file ijerph-16-01152-s001.pdf]

**Table S1.** Training load during intervention.

| Training load | Tai Chi  | Aerobic Exercise |
|---------------|----------|------------------|
| HRmean (bpm)  |          |                  |
| week 4        | 97 ± 9   | 105 ± 8 *        |
| week 8        | 98 ± 6   | 109 ± 8 *        |
| week 12       | 101 ± 14 | 107 ± 13         |

HRmean, mean heart rate during class; \*:  $p < 0.05$ .
